# Supplementary material for: On peptide bond formation from protonated glycine dimers in the gas phase: computational insight into the role of protonation
Source: Royal Society of Chemistry journal article supplement (doi:10.1039/d4cp04437a), 2025-01-01
Supplement: d4cp04437a1.pdf [file d4cp04437a1.pdf]

*Supplementary material*

**On peptide bond formation from protonated glycine dimers in the gas phase: computational insight into the role of protonation**

Léo Lavy,<sup>a</sup> Denis Comte,<sup>ac</sup> Florent Calvo,<sup>b</sup> Bernadette Farizon,<sup>a</sup> Michel Farizon,<sup>a\*</sup> Tilmann Märk<sup>c</sup>

---

<sup>a.</sup> *Université Claude Bernard Lyon 1, CNRS/IN2P3, UMR 5822, Institut de Physique des 2 Infinis de Lyon, F-69622 Villeurbanne, France*

<sup>b.</sup> *Université Grenoble Alpes, CNRS, LIPhy, 38000 Grenoble, France*

<sup>c.</sup> *Institut für Ionenphysik und Angewandte Physik, Universität Innsbruck, A-6020 Innsbruck, Austria*

This PDF file contains:

**I Supplementary Figure S1**

**II Cartesian coordinates of the stationary points**

**obtained for the mixed dimer  $\text{H}^+\text{Gly}_2(\text{Gly})$**

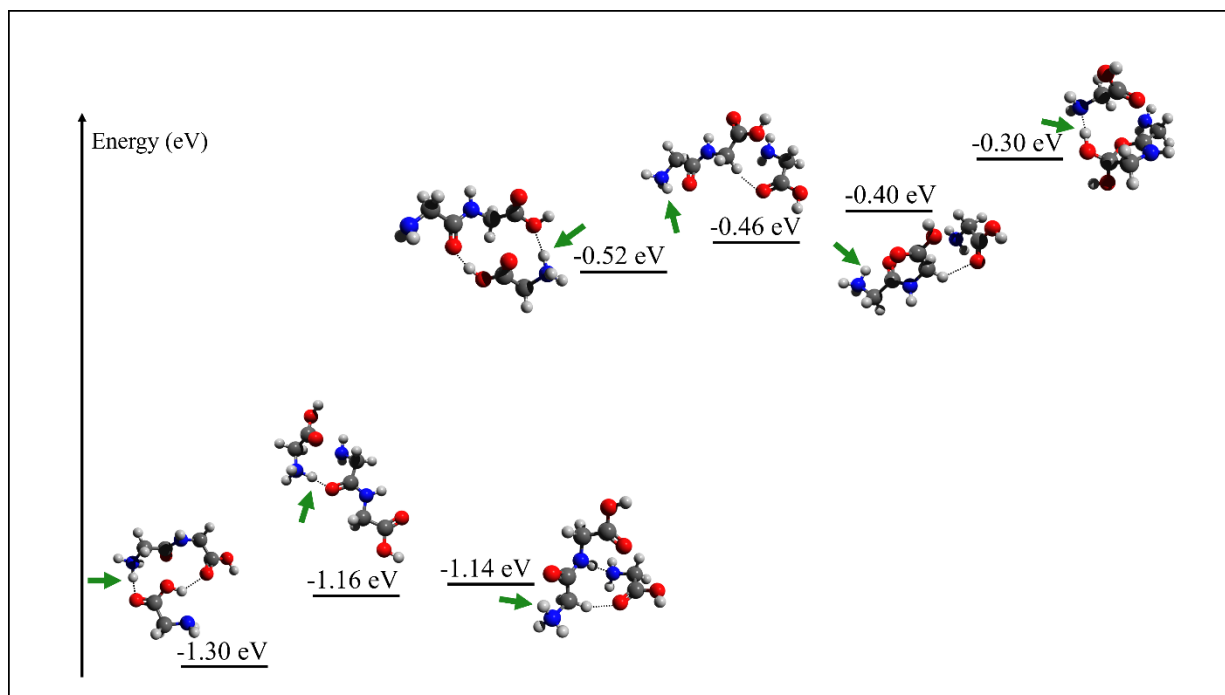

**Figure S1.** Conformers of the protonated cluster of dipeptide of glycine and glycine follow captions of main article: calculated at the DFT/M06-2X/6-311G++(2df,p) level of theory. The energies account for the harmonic zero-point correction scaled by the factor 0.9663. The green arrows point at the specific protonation site.

**Table S1: Cartesian coordinates for the M06-2X structures of H<sup>+</sup>Gly<sub>2</sub>(Gly) pathways in Å**

**Ground state**

|   |           |           |           |
|---|-----------|-----------|-----------|
| H | 1.088269  | -2.606336 | -1.208998 |
| H | 3.087523  | 2.159815  | -1.173959 |
| O | 1.018241  | 0.416756  | 0.412570  |
| H | 0.456446  | 1.228478  | 0.451727  |
| O | -0.674058 | -1.745699 | -1.239032 |
| O | -3.541817 | 1.630367  | -0.472220 |
| H | 2.211799  | -1.780995 | -0.270398 |
| O | -1.410721 | 1.573919  | 0.246343  |
| C | 2.260936  | 0.612257  | 0.002974  |
| O | 2.981120  | -0.354057 | -0.220470 |
| N | 1.558094  | -2.611950 | -0.297159 |
| H | -3.429555 | 2.585049  | -0.601243 |
| C | -2.448243 | 1.007143  | -0.005950 |
| H | 2.082046  | -3.467355 | -0.168490 |
| H | -2.936858 | -0.871648 | -0.845590 |
| C | 2.714788  | 2.049983  | -0.163717 |
| C | -0.671126 | -1.727672 | -0.015404 |
| H | 3.555106  | 2.206345  | 0.501045  |
| C | -2.743352 | -0.468187 | 0.137491  |
| H | 1.234569  | 3.447548  | -0.654450 |
| C | 0.464106  | -2.425912 | 0.731767  |
| N | -1.630063 | -1.179435 | 0.740185  |
| N | 1.597256  | 2.940778  | 0.129510  |
| H | 0.837773  | -1.817462 | 1.534519  |
| H | -3.635671 | -0.584114 | 0.734401  |
| H | 0.141278  | -3.392453 | 1.088470  |
| H | -1.528654 | -1.135700 | 1.731726  |
| H | 1.714151  | 3.527121  | 0.932986  |

**TS<sub>1</sub> – TS<sub>2</sub> pathway**

**Initial**

|   |           |           |           |
|---|-----------|-----------|-----------|
| C | 1.403773  | 0.726009  | 0.028615  |
| H | 0.639303  | 0.941625  | 2.053476  |
| O | 1.173645  | 1.406837  | -0.955720 |
| C | 0.306680  | 0.563736  | 1.088551  |
| O | -2.722573 | -0.529076 | 0.287373  |
| H | 0.016867  | -0.481488 | 1.193720  |
| C | -3.882791 | -0.271983 | 0.025139  |
| H | -1.132097 | 2.091690  | 1.229696  |
| N | -0.861006 | 1.339344  | 0.599788  |
| H | -4.953917 | -1.971947 | 0.685865  |
| C | -4.934307 | -1.343645 | -0.206259 |
| H | -1.691145 | 0.693324  | 0.443781  |
| N | -6.216646 | -0.718622 | -0.491822 |
| H | -4.576531 | -1.972344 | -1.023526 |

|   |           |           |           |
|---|-----------|-----------|-----------|
| H | -6.575483 | -0.955537 | -1.407350 |
| H | -6.926276 | -0.943516 | 0.192986  |
| O | -4.308511 | 0.960221  | -0.076313 |
| H | -5.272574 | 0.889290  | -0.294537 |
| H | -0.553345 | 1.750234  | -0.304035 |
| C | 4.801041  | -0.628364 | -0.065425 |
| C | 3.663854  | 0.174573  | -0.651893 |
| N | 2.550016  | 0.097345  | 0.267743  |
| O | 4.728479  | -1.209583 | 0.980557  |
| H | 3.984891  | 1.208062  | -0.801684 |
| H | 3.400253  | -0.228637 | -1.632565 |
| H | 2.701544  | -0.460367 | 1.100900  |
| H | 6.574910  | -1.124461 | -0.446816 |
| O | 5.867404  | -0.601445 | -0.852427 |

**TS<sub>1</sub>**

|   |           |           |           |
|---|-----------|-----------|-----------|
| C | 0.421616  | 0.786634  | 0.039869  |
| H | -0.008667 | 2.397132  | -1.250916 |
| O | -0.322592 | -0.184237 | 0.251360  |
| C | -0.068393 | 2.206270  | -0.175550 |
| O | -2.594479 | -0.135788 | 1.640472  |
| H | 0.639037  | 2.886152  | 0.310983  |
| C | -2.256718 | -0.685155 | 0.724973  |
| H | -1.730346 | 3.345315  | 0.059516  |
| N | -1.447671 | 2.388887  | 0.253248  |
| H | -1.632000 | -2.526190 | 0.002347  |
| C | -2.331821 | -1.758020 | -0.337047 |
| H | -1.532234 | 2.269079  | 1.258932  |
| N | -3.650432 | -2.235428 | -0.492467 |
| H | -1.939949 | -1.295050 | -1.238662 |
| H | -4.294108 | -1.533202 | -0.832194 |
| H | -4.026173 | -2.768656 | 0.278520  |
| O | -3.351709 | 0.733373  | -1.092260 |
| H | -4.039524 | 1.170266  | -1.600802 |
| H | -2.774671 | 1.430383  | -0.721020 |
| C | 3.861834  | -0.465322 | -0.088740 |
| C | 2.372195  | -0.670095 | 0.075482  |
| N | 1.733862  | 0.621104  | -0.040921 |
| O | 4.362270  | 0.606677  | -0.275254 |
| H | 2.014658  | -1.363072 | -0.689557 |
| H | 2.176073  | -1.124612 | 1.049384  |
| H | 2.357384  | 1.405137  | -0.205229 |
| H | 5.465664  | -1.448897 | -0.105811 |
| O | 4.516793  | -1.613973 | 0.002129  |

**Intermediate 1**

|   |           |           |           |
|---|-----------|-----------|-----------|
| C | 0.386984  | 0.487770  | -0.058226 |
| H | 0.199428  | 2.562715  | -0.467338 |
| O | -0.165299 | -0.684554 | -0.048918 |
| C | -0.450017 | 1.747912  | -0.137280 |
| O | -1.935584 | -0.292134 | 1.310722  |

|   |           |           |           |
|---|-----------|-----------|-----------|
| H | -0.757461 | 1.977819  | 0.886622  |
| C | -1.581701 | -0.804714 | 0.314739  |
| H | -1.507224 | 1.947091  | -1.893539 |
| N | -1.588085 | 1.509389  | -0.986682 |
| H | -1.813455 | -2.666450 | -0.637994 |
| C | -2.300206 | -1.685837 | -0.669502 |
| H | -2.476152 | 1.741495  | -0.550994 |
| N | -3.707138 | -1.800317 | -0.450817 |
| H | -2.087998 | -1.266478 | -1.656677 |
| H | -4.164111 | -0.895200 | -0.430944 |
| H | -3.937072 | -2.311886 | 0.390989  |
| O | -4.149676 | 1.290435  | 0.503883  |
| H | -3.965848 | 0.909526  | 1.368959  |
| H | -4.957428 | 1.803990  | 0.598112  |
| C | 3.975571  | -0.105647 | 0.054518  |
| C | 2.552533  | -0.630067 | 0.065755  |
| N | 1.679367  | 0.528720  | -0.045870 |
| O | 4.229804  | 1.059811  | -0.050491 |
| H | 2.399614  | -1.314156 | -0.771144 |
| H | 2.358204  | -1.174687 | 0.991473  |
| H | 2.167449  | 1.422275  | -0.121220 |
| H | 5.748330  | -0.732131 | 0.161215  |
| O | 4.846471  | -1.089178 | 0.171808  |

**TS<sub>2</sub>**

|   |           |           |           |
|---|-----------|-----------|-----------|
| C | 0.347345  | 0.230902  | -0.298399 |
| O | -0.196516 | -0.828088 | 0.100421  |
| O | -2.139130 | -0.104031 | 1.371717  |
| C | -1.904516 | -0.649597 | 0.366207  |
| H | -2.136909 | -2.717121 | 0.318162  |
| C | -2.484578 | -1.880271 | -0.294910 |
| N | -3.914362 | -1.878814 | -0.357342 |
| H | -2.046639 | -1.999475 | -1.284410 |
| H | -4.304680 | -1.172642 | -0.966805 |
| H | -4.357701 | -1.835958 | 0.550901  |
| O | -3.033902 | 2.524325  | 0.724433  |
| H | -3.108287 | 2.000845  | 1.529964  |
| H | -3.525959 | 3.336310  | 0.874479  |
| C | 3.960430  | -0.060223 | 0.085249  |
| C | 2.562214  | -0.626368 | 0.217265  |
| N | 1.645911  | 0.376825  | -0.293964 |
| O | 4.181244  | 1.022629  | -0.377215 |
| H | 2.485703  | -1.556038 | -0.350475 |
| H | 2.349239  | -0.854509 | 1.263510  |
| H | 2.083416  | 1.227679  | -0.641252 |
| H | 5.749768  | -0.523906 | 0.442746  |
| O | 4.865404  | -0.909889 | 0.538439  |
| H | -0.673881 | 2.075773  | 0.014721  |
| H | -2.601589 | 1.373249  | -0.788771 |
| C | -0.554648 | 1.342199  | -0.786443 |
| N | -1.848399 | 0.732378  | -1.048700 |

|   |           |          |           |
|---|-----------|----------|-----------|
| H | -0.119046 | 1.842676 | -1.652427 |
| H | -1.949762 | 0.410982 | -2.006483 |

**Intermediate 2**

|   |           |           |           |
|---|-----------|-----------|-----------|
| C | 0.388801  | -0.020053 | -0.270454 |
| O | -0.000855 | -1.163485 | -0.089165 |
| O | -2.176563 | 0.282040  | 1.685602  |
| C | -2.306183 | -0.306199 | 0.672743  |
| H | -3.937352 | -1.617038 | 0.627046  |
| C | -2.861174 | -1.691497 | 0.443687  |
| N | -2.612162 | -2.147304 | -0.909670 |
| H | -2.441680 | -2.315122 | 1.237380  |
| H | -1.729554 | -2.643039 | -0.969664 |
| H | -3.351014 | -2.748960 | -1.249109 |
| O | -3.856867 | 2.353967  | -0.144776 |
| H | -3.951652 | 2.583781  | 0.785305  |
| H | -4.474254 | 2.910339  | -0.629266 |
| C | 4.025413  | 0.201960  | 0.062417  |
| C | 2.728210  | -0.573496 | 0.049926  |
| N | 1.661798  | 0.359557  | -0.240081 |
| O | 4.090693  | 1.379968  | -0.148729 |
| H | 2.784664  | -1.363547 | -0.702593 |
| H | 2.580351  | -1.055360 | 1.019086  |
| H | 1.947097  | 1.321934  | -0.386271 |
| H | 5.869008  | -0.058622 | 0.332800  |
| O | 5.056016  | -0.586001 | 0.332718  |
| H | -0.661568 | 1.798543  | 0.276851  |
| H | -2.702782 | 1.150339  | -0.720739 |
| C | -0.636509 | 1.078353  | -0.541749 |
| N | -1.962581 | 0.426026  | -0.617833 |
| H | -0.440434 | 1.601433  | -1.477389 |
| H | -2.030975 | -0.298965 | -1.354969 |

**Final (Gly<sub>3</sub>)**

|   |           |           |           |
|---|-----------|-----------|-----------|
| C | -0.034584 | -0.207457 | -0.291224 |
| O | 0.535214  | 0.849062  | -0.060793 |
| O | 2.445221  | -1.016084 | 1.603918  |
| C | 2.680758  | -0.389252 | 0.641265  |
| H | 4.492990  | 0.665800  | 0.643232  |
| C | 3.438282  | 0.907893  | 0.481017  |
| N | 3.242311  | 1.471334  | -0.840726 |
| H | 3.121756  | 1.539342  | 1.314824  |
| H | 2.459609  | 2.116270  | -0.848759 |
| H | 4.067786  | 1.950478  | -1.176532 |
| C | -3.657391 | 0.118007  | 0.080332  |
| C | -2.254672 | 0.681234  | 0.110415  |
| N | -1.347537 | -0.389273 | -0.245040 |
| O | -3.900822 | -1.023164 | -0.193702 |
| H | -2.180020 | 1.514906  | -0.591298 |
| H | -2.037612 | 1.071074  | 1.107556  |
| H | -1.782467 | -1.286038 | -0.437123 |

|   |           |           |           |
|---|-----------|-----------|-----------|
| H | -5.439658 | 0.649086  | 0.365765  |
| O | -4.553928 | 1.041504  | 0.391320  |
| H | 0.736777  | -2.197384 | 0.115985  |
| H | 2.835528  | -1.733588 | -0.977321 |
| C | 0.806535  | -1.430119 | -0.656284 |
| N | 2.213056  | -0.963159 | -0.720344 |
| H | 0.522048  | -1.851172 | -1.620345 |
| H | 2.369409  | -0.163470 | -1.372290 |

### TS<sub>3</sub> pathway

#### Initial

|   |           |           |           |
|---|-----------|-----------|-----------|
| H | 4.325763  | -1.350896 | -0.119596 |
| O | 4.249228  | -0.390272 | -0.029775 |
| C | 2.971275  | -0.041978 | -0.025618 |
| H | 3.300032  | 1.895710  | -0.767719 |
| O | 2.066207  | -0.840581 | -0.104403 |
| C | 2.802523  | 1.450790  | 0.097246  |
| O | -2.674114 | 2.776383  | 0.007200  |
| H | 3.374994  | 1.766880  | 0.977267  |
| C | -1.873155 | 1.739897  | 0.231958  |
| N | 1.398644  | 1.815226  | 0.101952  |
| H | -0.973756 | 1.721286  | -1.705633 |
| C | -1.526840 | 1.033332  | -1.067441 |
| N | -0.723062 | -0.134734 | -0.809013 |
| H | -2.450461 | 0.756045  | -1.575643 |
| H | 0.277843  | 0.003185  | -0.667401 |
| O | -1.467056 | 1.412347  | 1.311308  |
| H | -2.887108 | 3.201698  | 0.850843  |
| H | 1.300742  | 2.812114  | -0.052975 |
| H | 0.962100  | 1.613695  | 0.997663  |
| H | -1.239393 | -4.285734 | -0.057889 |
| N | -1.328270 | -3.447312 | 0.514356  |
| C | -0.373704 | -2.363189 | 0.133289  |
| H | -1.267211 | -3.714060 | 1.495776  |
| H | -2.263072 | -2.965122 | 0.317782  |
| H | 0.208882  | -2.047727 | 0.994836  |
| H | 0.308859  | -2.700940 | -0.641873 |
| O | -2.504121 | -1.439507 | -0.284545 |
| C | -1.295191 | -1.233076 | -0.351897 |

#### TS<sub>3</sub>

|   |          |           |           |
|---|----------|-----------|-----------|
| H | 4.352659 | -2.363656 | 0.476357  |
| O | 4.329040 | -1.400429 | 0.574837  |
| C | 3.288349 | -0.921056 | -0.092328 |
| H | 4.083720 | 1.029343  | -0.486176 |
| O | 2.504344 | -1.583007 | -0.714306 |
| C | 3.213319 | 0.587524  | 0.000072  |
| O | 0.361701 | 2.452095  | -0.036503 |

|   |           |           |           |
|---|-----------|-----------|-----------|
| H | 3.208879  | 0.884653  | 1.047576  |
| C | 0.721110  | 0.742760  | 0.180230  |
| N | 1.987540  | 1.048271  | -0.639296 |
| H | 0.024802  | -0.864169 | -1.031921 |
| C | -0.364819 | 0.089833  | -0.665365 |
| N | -1.473868 | -0.131742 | 0.245244  |
| H | -0.686834 | 0.711972  | -1.498046 |
| H | -1.204255 | -0.159400 | 1.226079  |
| O | 0.857705  | 0.431321  | 1.353158  |
| H | 0.365075  | 2.851740  | 0.841437  |
| H | 1.913384  | 0.685823  | -1.588757 |
| H | 1.531753  | 2.173188  | -0.500131 |
| H | -5.513190 | -1.496312 | 0.264040  |
| N | -5.053087 | -0.592793 | 0.160004  |
| C | -3.790420 | -0.472181 | 0.942285  |
| H | -5.729511 | 0.142985  | 0.359665  |
| H | -4.660587 | -0.483616 | -0.838634 |
| H | -3.841260 | 0.382528  | 1.613125  |
| H | -3.613892 | -1.378028 | 1.518152  |
| O | -3.121481 | -0.262644 | -1.309723 |
| C | -2.718424 | -0.273865 | -0.148916 |

### Intermediate

|   |           |           |           |
|---|-----------|-----------|-----------|
| H | -4.958908 | -0.841292 | 1.539202  |
| O | -4.611571 | -1.036303 | 0.656397  |
| C | -3.541108 | -0.285575 | 0.435599  |
| H | -3.703375 | -0.145334 | -1.681232 |
| O | -3.092431 | 0.494988  | 1.233304  |
| C | -2.981097 | -0.521121 | -0.955066 |
| O | -1.422731 | 2.592996  | 0.256085  |
| H | -2.877805 | -1.594494 | -1.111541 |
| C | -0.600400 | -0.452750 | -0.637661 |
| N | -1.708340 | 0.125662  | -1.137092 |
| H | 0.512186  | 1.328196  | -0.148047 |
| C | 0.662842  | 0.398162  | -0.701174 |
| N | 1.720813  | -0.404340 | -0.116798 |
| H | 0.900910  | 0.650250  | -1.736897 |
| H | 1.411548  | -1.320460 | 0.204877  |
| O | -0.562548 | -1.580096 | -0.181309 |
| H | -2.000417 | 2.058558  | 0.822407  |
| H | -1.693626 | 1.134027  | -1.242568 |
| H | -1.565202 | 3.511399  | 0.496454  |
| H | 5.663548  | 0.016970  | 1.453106  |
| N | 5.264221  | -0.195182 | 0.539589  |
| C | 3.986368  | -0.959305 | 0.609799  |
| H | 5.978504  | -0.644758 | -0.031858 |
| H | 4.913949  | 0.706474  | 0.064367  |
| H | 4.069918  | -1.888359 | 0.050076  |
| H | 3.734487  | -1.180192 | 1.644687  |
| O | 3.404753  | 1.082987  | -0.419351 |
| C | 2.965670  | 0.002162  | -0.032153 |



**Final (Gly<sub>3</sub>)**

|   |           |           |           |
|---|-----------|-----------|-----------|
| H | -4.908448 | -1.705954 | 0.634629  |
| O | -4.716834 | -0.957310 | 0.051558  |
| C | -3.536876 | -0.440569 | 0.388855  |
| H | -3.950761 | 1.521955  | -0.368715 |
| O | -2.838959 | -0.845778 | 1.271644  |
| C | -3.195568 | 0.747292  | -0.496922 |
| H | -3.219996 | 0.424070  | -1.537641 |
| C | -0.806992 | 0.521507  | -0.469597 |
| N | -1.889638 | 1.265881  | -0.172097 |
| H | 0.411648  | 0.891606  | 1.272957  |
| C | 0.499910  | 0.957401  | 0.185630  |
| N | 1.517201  | 0.045325  | -0.295805 |
| H | 0.746726  | 1.988131  | -0.078153 |
| H | 1.161691  | -0.664130 | -0.935439 |
| O | -0.827306 | -0.434198 | -1.217816 |
| H | -1.819192 | 1.927909  | 0.585838  |
| H | 5.403428  | -1.356379 | 0.765637  |
| N | 5.041546  | -0.614835 | 0.166438  |
| C | 3.737973  | -0.951992 | -0.475529 |
| H | 5.767760  | -0.352731 | -0.499678 |
| H | 4.759632  | 0.231253  | 0.757602  |
| H | 3.820726  | -0.873491 | -1.557490 |
| H | 3.436277  | -1.962086 | -0.206857 |
| O | 3.244761  | 0.917766  | 0.881712  |
| C | 2.770461  | 0.101596  | 0.097692  |

**TS<sub>4</sub> pathway****Initial**

|   |           |           |           |
|---|-----------|-----------|-----------|
| C | -0.524946 | -0.245358 | -0.397218 |
| H | -0.218336 | -2.339951 | -0.718426 |
| O | -0.085593 | 0.898269  | -0.582392 |
| C | 0.370770  | -1.467527 | -0.417598 |
| O | 4.291478  | -0.950576 | 0.610734  |
| H | 0.695859  | -1.626992 | 0.615226  |
| C | 3.340468  | -0.032360 | 0.697139  |
| N | 1.546256  | -1.220352 | -1.241304 |
| H | 3.585952  | 0.547556  | -1.351810 |
| C | 3.491350  | 1.018366  | -0.377300 |
| N | 2.275236  | 1.855410  | -0.345504 |
| H | 4.376746  | 1.623684  | -0.175997 |
| H | 2.151460  | 2.254657  | 0.587922  |
| O | 2.478393  | 0.006852  | 1.528019  |
| H | 4.223238  | -1.558805 | 1.362470  |
| H | 1.346878  | 1.285675  | -0.527541 |
| H | 1.282729  | -1.150183 | -2.220059 |
| H | 2.181130  | -2.009773 | -1.174439 |
| H | -2.807010 | 1.221726  | -0.939722 |
| H | -5.904443 | 0.528307  | 0.546843  |

|   |           |           |           |
|---|-----------|-----------|-----------|
| O | -4.309989 | -1.164025 | 0.328570  |
| C | -4.120096 | 0.015699  | 0.244004  |
| O | -5.050657 | 0.952063  | 0.372628  |
| N | -1.809282 | -0.453380 | -0.148774 |
| C | -2.763433 | 0.624811  | -0.025994 |
| H | -2.181318 | -1.388950 | -0.027622 |
| H | -2.499468 | 1.299346  | 0.791797  |
| H | 2.327386  | 2.619494  | -1.018240 |

#### TS<sub>4</sub>

|   |           |           |           |
|---|-----------|-----------|-----------|
| C | -0.391693 | -0.212496 | -0.348218 |
| H | 0.149867  | -2.250258 | -0.823553 |
| O | 0.030991  | 0.899866  | -0.674823 |
| C | 0.540007  | -1.414413 | -0.241330 |
| O | 3.943817  | -1.218499 | -0.004384 |
| H | 0.608708  | -1.716192 | 0.804633  |
| C | 2.682959  | -0.191173 | 0.273798  |
| N | 1.872678  | -1.072152 | -0.709769 |
| H | 3.163015  | 1.175561  | -1.418120 |
| C | 3.181139  | 1.131408  | -0.331103 |
| N | 2.243146  | 2.150553  | 0.220398  |
| H | 4.184015  | 1.337938  | 0.035040  |
| H | 2.197505  | 1.986873  | 1.235646  |
| O | 2.283432  | -0.153063 | 1.436877  |
| H | 4.232575  | -1.570900 | 0.850009  |
| H | 1.290132  | 1.932693  | -0.149858 |
| H | 1.838404  | -0.672460 | -1.644896 |
| H | 2.971309  | -1.735117 | -0.515527 |
| H | -2.694910 | 1.070145  | -1.127258 |
| H | -5.838395 | 0.406855  | 0.271786  |
| O | -4.156555 | -1.213340 | 0.365140  |
| C | -4.017638 | -0.046506 | 0.133027  |
| O | -4.995593 | 0.847768  | 0.086777  |
| N | -1.670236 | -0.442211 | -0.084200 |
| C | -2.676332 | 0.593510  | -0.144576 |
| H | -2.006319 | -1.368681 | 0.157328  |
| H | -2.492442 | 1.375814  | 0.595616  |
| H | 2.518044  | 3.110562  | 0.017872  |

#### Intermediate

|   |           |           |           |
|---|-----------|-----------|-----------|
| C | 0.319708  | 0.239432  | 0.152672  |
| H | -0.277743 | 2.004631  | 1.262145  |
| O | -0.193961 | -0.348181 | -0.800231 |
| C | -0.526985 | 0.944389  | 1.229361  |
| O | -3.373254 | 2.291234  | -1.210367 |
| H | -0.303337 | 0.505568  | 2.202196  |
| C | -2.370127 | -0.494372 | 0.902706  |
| N | -1.923530 | 0.777930  | 0.913709  |
| H | -3.717264 | 0.004258  | -0.775380 |
| C | -3.395442 | -0.843212 | -0.173951 |
| N | -2.582270 | -1.766435 | -1.040062 |

|   |           |           |           |
|---|-----------|-----------|-----------|
| H | -4.238657 | -1.396907 | 0.232489  |
| H | -2.328074 | -2.587211 | -0.479543 |
| O | -1.893124 | -1.404697 | 1.543187  |
| H | -2.965056 | 2.666031  | -1.996955 |
| H | -1.682522 | -1.282711 | -1.261832 |
| H | -2.321084 | 1.412469  | 0.227667  |
| H | -4.068138 | 2.909630  | -0.962500 |
| H | 2.433340  | 0.096459  | -1.616328 |
| H | 5.762125  | -0.273828 | -0.602547 |
| O | 4.205132  | 0.672657  | 0.853416  |
| C | 3.967698  | 0.029705  | -0.128979 |
| O | 4.880405  | -0.494237 | -0.937985 |
| N | 1.635272  | 0.318210  | 0.317352  |
| C | 2.568736  | -0.287783 | -0.602777 |
| H | 2.043791  | 0.804408  | 1.108052  |
| H | 2.440776  | -1.372093 | -0.645893 |
| H | -3.067586 | -2.061819 | -1.886930 |

**Final (Gly<sub>3</sub>)**

|   |           |           |           |
|---|-----------|-----------|-----------|
| C | -0.042084 | -0.335621 | -0.318984 |
| H | 0.382160  | -2.362331 | -0.983038 |
| O | 0.495839  | 0.750046  | -0.543682 |
| C | 0.768671  | -1.644710 | -0.260420 |
| H | 0.680097  | -2.076601 | 0.736627  |
| C | 2.766414  | -0.515001 | 0.318441  |
| N | 2.153955  | -1.353605 | -0.549159 |
| H | 3.886374  | 0.443337  | -1.341236 |
| C | 3.733853  | 0.513652  | -0.266740 |
| N | 3.005186  | 1.793808  | 0.028554  |
| H | 4.684296  | 0.517704  | 0.262148  |
| H | 2.922879  | 1.884580  | 1.047658  |
| O | 2.478100  | -0.406985 | 1.486492  |
| H | 2.028652  | 1.692814  | -0.330593 |
| H | 2.394707  | -1.263886 | -1.524855 |
| H | -2.209479 | 1.193143  | -1.089636 |
| H | -5.418169 | 0.764749  | 0.253473  |
| O | -3.902476 | -1.012082 | 0.264275  |
| C | -3.648285 | 0.146806  | 0.099801  |
| O | -4.535317 | 1.132841  | 0.098050  |
| N | -1.346576 | -0.461269 | -0.116741 |
| C | -2.248518 | 0.667671  | -0.132808 |
| H | -1.773861 | -1.364129 | 0.062157  |
| H | -1.997998 | 1.389924  | 0.647788  |
| H | 3.462912  | 2.620807  | -0.355885 |

**TS<sub>s</sub> pathway**

**Initial**

|   |           |           |           |
|---|-----------|-----------|-----------|
| H | -0.447368 | -1.637309 | -0.780293 |
| O | 0.537300  | -2.000512 | -0.847662 |
| C | 1.270904  | -1.438731 | 0.045732  |

|   |           |           |           |
|---|-----------|-----------|-----------|
| H | 3.079017  | -1.731856 | -1.128038 |
| O | 0.928364  | -0.668447 | 0.917548  |
| C | 2.751151  | -1.777828 | -0.091926 |
| O | 0.541021  | 2.645037  | 0.838359  |
| H | 2.970074  | -2.762045 | 0.320691  |
| C | 0.823575  | 1.959308  | -0.089100 |
| H | 4.470003  | -0.904542 | 0.782212  |
| N | 3.466334  | -0.735142 | 0.703851  |
| H | 0.170006  | 0.357900  | -1.395118 |
| C | -0.173981 | 1.318608  | -1.025007 |
| H | 3.033199  | -0.684911 | 1.634713  |
| N | -1.452017 | 1.178932  | -0.379213 |
| H | -0.245282 | 1.983154  | -1.894196 |
| H | -1.829469 | 2.007263  | 0.061232  |
| O | 2.122670  | 1.761979  | -0.479704 |
| H | 2.634713  | 2.468326  | -0.054459 |
| H | 3.287342  | 0.185039  | 0.274411  |
| C | -2.132548 | 0.031538  | -0.236434 |
| C | -3.488576 | 0.155823  | 0.451344  |
| N | -4.174246 | -1.076209 | 0.707886  |
| O | -1.737002 | -1.059758 | -0.650304 |
| H | -3.338095 | 0.698659  | 1.389502  |
| H | -4.110756 | 0.798894  | -0.179015 |
| H | -4.345420 | -1.593949 | -0.145381 |
| H | -3.650433 | -1.676380 | 1.332522  |

### TS<sub>5</sub>

|   |           |           |           |
|---|-----------|-----------|-----------|
| H | 3.733314  | -2.704298 | -0.164203 |
| O | 4.099585  | -1.813455 | -0.273557 |
| C | 3.149170  | -0.913455 | -0.106265 |
| H | 3.950135  | 0.588806  | -1.332705 |
| O | 2.001533  | -1.199747 | 0.145637  |
| C | 3.674512  | 0.489589  | -0.279639 |
| O | 0.168353  | 0.276363  | 1.728301  |
| H | 4.605413  | 0.565900  | 0.290859  |
| C | 0.072183  | 0.129990  | 0.632637  |
| H | 2.960021  | 2.381986  | -0.303784 |
| N | 2.662413  | 1.482666  | 0.060543  |
| H | -0.046780 | -1.048548 | -1.039189 |
| C | -0.275045 | -0.005944 | -0.809326 |
| H | 2.615913  | 1.595015  | 1.069693  |
| N | -1.643937 | 0.320142  | -1.012912 |
| H | 0.411698  | 0.657463  | -1.332985 |
| H | -1.860487 | 1.254846  | -1.329235 |
| O | -0.400986 | 2.713894  | 0.048931  |
| H | -0.938614 | 3.355352  | 0.524568  |
| H | 0.406356  | 3.180202  | -0.187631 |
| C | -2.564690 | -0.412097 | -0.279037 |
| C | -4.029280 | -0.088747 | -0.518557 |
| N | -4.960734 | -0.808516 | 0.299530  |
| O | -2.155821 | -1.256390 | 0.484016  |

|   |           |           |           |
|---|-----------|-----------|-----------|
| H | -4.163828 | 0.989769  | -0.379427 |
| H | -4.234010 | -0.281412 | -1.576091 |
| H | -4.906017 | -1.806724 | 0.137885  |
| H | -4.799716 | -0.649730 | 1.286625  |

**Intermediate**

|   |           |           |           |
|---|-----------|-----------|-----------|
| H | 5.069908  | 0.860300  | 0.133053  |
| O | 4.556400  | 0.051105  | 0.284776  |
| C | 3.312753  | 0.223547  | -0.107503 |
| H | 2.400154  | -1.230781 | 1.191284  |
| O | 2.849570  | 1.218753  | -0.594904 |
| C | 2.470235  | -1.013370 | 0.125475  |
| O | 0.487740  | 0.349262  | 1.543196  |
| H | 2.889476  | -1.878493 | -0.387745 |
| C | 0.451326  | 0.405255  | 0.367750  |
| H | 0.484716  | -1.598657 | -0.280284 |
| N | 1.112562  | -0.729146 | -0.392457 |
| H | -0.055415 | 1.280358  | -1.540245 |
| C | -0.173997 | 1.500737  | -0.476973 |
| H | 1.153635  | -0.500554 | -1.387481 |
| N | -1.562793 | 1.643451  | -0.125877 |
| H | 0.368321  | 2.418955  | -0.252344 |
| H | -1.933050 | 2.542453  | 0.139699  |
| O | -0.484947 | -2.811892 | -0.244087 |
| H | -0.511966 | -3.651381 | 0.222590  |
| H | -1.367905 | -2.412256 | -0.238456 |
| C | -2.343757 | 0.540683  | -0.154888 |
| C | -3.821255 | 0.727185  | 0.153606  |
| N | -4.612217 | -0.467277 | 0.191032  |
| O | -1.832141 | -0.539911 | -0.428247 |
| H | -3.897890 | 1.251293  | 1.111057  |
| H | -4.223241 | 1.412043  | -0.599894 |
| H | -4.590368 | -0.971695 | -0.685808 |
| H | -4.334040 | -1.093536 | 0.935016  |

**Final (Gly<sub>3</sub>)**

|   |           |           |           |
|---|-----------|-----------|-----------|
| H | -5.021670 | 0.692213  | 0.375591  |
| O | -4.155845 | 1.046313  | 0.633891  |
| C | -3.209658 | 0.509798  | -0.105596 |
| H | -1.660230 | 1.018219  | 1.315258  |
| O | -3.352332 | -0.301519 | -0.976627 |
| C | -1.841188 | 1.066867  | 0.243487  |
| O | -1.094654 | -1.367242 | 1.181629  |
| H | -1.763832 | 2.100955  | -0.092929 |
| C | -0.510220 | -1.056278 | 0.210294  |
| H | 0.126142  | 0.689808  | -0.637568 |
| N | -0.845930 | 0.246518  | -0.476970 |
| H | 0.625128  | -1.625102 | -1.534686 |
| C | 0.654181  | -1.777690 | -0.451740 |
| H | -1.252328 | 0.001109  | -1.393219 |
| N | 1.918852  | -1.312290 | 0.087575  |

|   |          |           |           |
|---|----------|-----------|-----------|
| H | 0.541010 | -2.837519 | -0.235081 |
| H | 2.510800 | -1.982775 | 0.555584  |
| C | 2.385595 | -0.063263 | -0.132795 |
| C | 3.823394 | 0.214697  | 0.281711  |
| N | 4.237248 | 1.582442  | 0.225798  |
| O | 1.678607 | 0.795764  | -0.661104 |
| H | 3.970261 | -0.181544 | 1.291253  |
| H | 4.457287 | -0.391089 | -0.375316 |
| H | 4.137564 | 1.977912  | -0.700456 |
| H | 3.739859 | 2.169807  | 0.882270  |

**TS<sub>6</sub> – TS<sub>7</sub> pathway**

**Initial**

|   |           |           |           |
|---|-----------|-----------|-----------|
| O | -2.928386 | -0.336542 | 1.580644  |
| O | -4.301523 | 1.046288  | 0.462488  |
| O | 0.100729  | -0.831712 | -0.415261 |
| N | -2.299572 | -1.756204 | -0.498232 |
| N | -1.503395 | 1.331312  | -0.996191 |
| C | -3.527580 | -0.934712 | -0.620086 |
| C | -3.634900 | 0.062974  | 0.511954  |
| C | -0.269925 | 1.549401  | -0.258015 |
| C | 0.588248  | 0.297325  | -0.273939 |
| H | -2.183292 | 2.049593  | -0.766278 |
| H | -1.333909 | 1.402713  | -1.994997 |
| H | -3.091544 | 0.275881  | 2.313987  |
| H | -2.293910 | -2.257529 | 0.392539  |
| H | -4.405500 | -1.582824 | -0.593797 |
| H | -3.505457 | -0.390952 | -1.558835 |
| H | -0.516331 | 1.739726  | 0.790652  |
| H | 0.323870  | 2.401018  | -0.605627 |
| H | -1.370110 | -1.174151 | -0.514839 |
| H | 2.295088  | 1.393976  | -0.004599 |
| N | 1.889772  | 0.468485  | -0.094050 |
| H | 2.804517  | -1.236250 | -0.922870 |
| H | 2.575726  | -1.299595 | 0.821177  |
| C | 2.818949  | -0.635105 | -0.011030 |
| C | 4.202809  | -0.061144 | 0.191434  |
| O | 4.426531  | 1.113689  | 0.259646  |
| O | 5.113581  | -1.020791 | 0.281919  |
| H | 5.985757  | -0.618801 | 0.411830  |
| H | -2.245608 | -2.447833 | -1.246423 |

**TS<sub>6</sub>**

|   |          |           |           |
|---|----------|-----------|-----------|
| O | 2.318964 | -0.181813 | 1.445248  |
| O | 3.847344 | -1.243508 | 0.075160  |
| O | 0.012796 | 0.969281  | -0.591902 |
| N | 2.307262 | 2.070067  | 0.139231  |
| N | 1.865163 | -1.035199 | -0.777010 |
| C | 3.315008 | 1.059977  | -0.298977 |

|   |           |           |           |
|---|-----------|-----------|-----------|
| C | 2.909172  | -0.333180 | 0.184693  |
| C | 0.523257  | -1.372139 | -0.322805 |
| C | -0.406258 | -0.167902 | -0.354006 |
| H | 2.821473  | -1.772730 | -0.643294 |
| H | 1.847911  | -0.607469 | -1.701785 |
| H | 2.731521  | -0.846590 | 2.013701  |
| H | 2.270729  | 2.076652  | 1.161824  |
| H | 4.276516  | 1.288447  | 0.157667  |
| H | 3.412501  | 1.101950  | -1.382334 |
| H | 0.581266  | -1.755983 | 0.695838  |
| H | 0.123190  | -2.164252 | -0.958634 |
| H | 1.352862  | 1.754278  | -0.195094 |
| H | -2.027030 | -1.358248 | 0.042541  |
| N | -1.686493 | -0.416977 | -0.127552 |
| H | -2.728198 | 1.141841  | -1.084846 |
| H | -2.499647 | 1.366565  | 0.647210  |
| C | -2.694859 | 0.619998  | -0.125782 |
| C | -4.030362 | -0.038706 | 0.138946  |
| O | -4.159081 | -1.216827 | 0.313379  |
| O | -5.011035 | 0.851939  | 0.151300  |
| H | -5.850954 | 0.400454  | 0.324423  |
| H | 2.518683  | 3.008986  | -0.197801 |

#### Intermediate 1

|   |           |           |           |
|---|-----------|-----------|-----------|
| O | 2.735587  | -0.384331 | 1.370939  |
| O | 4.083839  | -1.102485 | -0.358963 |
| O | -0.127990 | 1.144487  | -0.219809 |
| N | 2.276065  | 1.957916  | 0.181952  |
| N | 1.780773  | -0.945824 | -0.643129 |
| C | 3.262710  | 1.051187  | -0.454463 |
| C | 2.947400  | -0.388635 | -0.016313 |
| C | 0.521151  | -1.182870 | 0.007304  |
| C | -0.481963 | -0.038553 | -0.098474 |
| H | 3.834518  | -2.023112 | -0.507502 |
| H | 1.737011  | -0.786590 | -1.639514 |
| H | 3.520876  | -0.753544 | 1.791395  |
| H | 2.394778  | 1.926754  | 1.196571  |
| H | 4.269390  | 1.318900  | -0.137174 |
| H | 3.185892  | 1.147509  | -1.536503 |
| H | 0.698134  | -1.361768 | 1.068875  |
| H | 0.067468  | -2.090745 | -0.397112 |
| H | 1.251266  | 1.608011  | -0.028272 |
| H | -2.060198 | -1.332868 | 0.036418  |
| N | -1.761778 | -0.365206 | -0.029172 |
| H | -2.792725 | 1.215414  | -0.960804 |
| H | -2.739949 | 1.308210  | 0.795832  |
| C | -2.821945 | 0.618016  | -0.046913 |
| C | -4.138786 | -0.120094 | 0.031704  |
| O | -4.222807 | -1.313662 | 0.091992  |
| O | -5.163183 | 0.721251  | 0.024381  |
| H | -5.989370 | 0.217466  | 0.075851  |

|   |          |          |           |
|---|----------|----------|-----------|
| H | 2.382509 | 2.921771 | -0.131007 |
|---|----------|----------|-----------|

### Intermediate 2

|   |           |           |           |
|---|-----------|-----------|-----------|
| O | 2.961669  | -0.815216 | 1.235675  |
| O | 3.827120  | -0.429702 | -0.882752 |
| N | 3.717957  | 1.688982  | 0.659839  |
| C | 2.436050  | 1.123850  | 0.103418  |
| C | 2.693524  | -0.378848 | -0.065347 |
| H | 3.948640  | -1.328385 | -1.214323 |
| H | 3.124755  | -1.766985 | 1.234005  |
| H | 2.224092  | 1.602722  | -0.847347 |
| H | 1.637580  | 1.323434  | 0.811011  |
| H | 3.933748  | 1.214955  | 1.543901  |
| H | 3.669586  | 2.697200  | 0.814307  |
| H | 4.480841  | 1.475947  | 0.007049  |
| H | 0.550212  | -1.321621 | 1.090927  |
| C | 0.387983  | -1.297216 | 0.010984  |
| N | 1.667732  | -1.170944 | -0.663672 |
| H | -2.673126 | 1.555491  | 0.301066  |
| C | -0.571682 | -0.153675 | -0.320002 |
| N | -1.855060 | -0.361889 | -0.004373 |
| O | -0.164908 | 0.878738  | -0.829649 |
| H | 1.544109  | -0.894485 | -1.632838 |
| H | -2.178451 | -1.240087 | 0.382771  |
| O | -4.345774 | -1.029125 | 0.627052  |
| C | -2.868354 | 0.634523  | -0.253866 |
| C | -4.201993 | 0.070179  | 0.171536  |
| O | -5.182311 | 0.945105  | -0.024299 |
| H | -0.065720 | -2.251510 | -0.263882 |
| H | -6.019151 | 0.545065  | 0.254525  |
| H | -2.911058 | 0.903931  | -1.312287 |

### TS<sub>7</sub>

|   |           |           |           |
|---|-----------|-----------|-----------|
| O | 3.125671  | -0.189516 | 1.413756  |
| O | 3.730615  | -1.197519 | -0.588825 |
| N | 4.456963  | 1.389573  | 0.255326  |
| C | 3.317687  | 1.097435  | -0.633893 |
| C | 2.814362  | -0.284549 | -0.211731 |
| H | 3.498582  | -2.089978 | -0.300502 |
| H | 2.354937  | 0.055473  | 1.942295  |
| H | 3.582256  | 1.063379  | -1.689939 |
| H | 2.546304  | 1.848612  | -0.474527 |
| H | 3.911502  | 0.656310  | 1.237455  |
| H | 4.614973  | 2.382105  | 0.394881  |
| H | 5.319614  | 0.964948  | -0.077952 |
| H | 0.271419  | 1.020465  | -1.052454 |
| C | 0.410049  | 0.320146  | -0.225224 |
| N | 1.516314  | -0.582737 | -0.464600 |
| H | -3.406028 | -1.342685 | -0.674784 |
| C | -0.843007 | -0.552507 | -0.064928 |
| N | -2.005920 | 0.104413  | -0.059116 |



|   |           |           |           |
|---|-----------|-----------|-----------|
| O | -0.734586 | -1.755829 | 0.063660  |
| H | 1.223595  | -1.556141 | -0.374942 |
| H | -2.066262 | 1.104942  | -0.203225 |
| O | -4.182739 | 1.604314  | -0.145781 |
| C | -3.262422 | -0.589335 | 0.103601  |
| C | -4.371065 | 0.432346  | 0.025752  |
| O | -5.562242 | -0.133146 | 0.171452  |
| H | 0.529345  | 0.902604  | 0.697292  |
| H | -6.245684 | 0.551046  | 0.115181  |
| H | -3.313426 | -1.107473 | 1.064381  |

### Intermediate 3

|   |           |           |           |
|---|-----------|-----------|-----------|
| O | -2.588494 | -1.085134 | 1.782689  |
| O | -3.723858 | 1.376682  | 0.001134  |
| N | -4.561382 | -1.157309 | -0.253977 |
| C | -3.347521 | -0.749135 | -0.935535 |
| C | -2.809302 | 0.518322  | -0.346013 |
| H | -3.384923 | 2.185050  | 0.413364  |
| H | -2.448643 | -1.290247 | 2.710666  |
| H | -3.463458 | -0.540734 | -2.011152 |
| H | -2.596511 | -1.530247 | -0.827358 |
| H | -3.502002 | -1.331282 | 1.572413  |
| H | -4.879581 | -2.050407 | -0.612879 |
| H | -5.312546 | -0.488122 | -0.383898 |
| H | -0.391759 | -0.474691 | -1.507053 |
| C | -0.455448 | -0.150073 | -0.467194 |
| N | -1.552121 | 0.785870  | -0.271534 |
| H | 3.420913  | 1.465729  | -0.450175 |
| C | 0.804972  | 0.631183  | -0.071906 |
| N | 1.955248  | -0.025920 | -0.187745 |
| O | 0.697016  | 1.779713  | 0.320466  |
| H | -1.193670 | 1.682737  | 0.087804  |
| H | 2.003391  | -0.986359 | -0.508725 |
| O | 4.090612  | -1.553782 | -0.447065 |
| C | 3.217219  | 0.585906  | 0.164743  |
| C | 4.302945  | -0.442075 | -0.051483 |
| O | 5.497605  | 0.046427  | 0.249918  |
| H | -0.595824 | -1.010481 | 0.191751  |
| H | 6.167812  | -0.636509 | 0.097516  |
| H | 3.224343  | 0.911065  | 1.207709  |

### Final (Gly<sub>3</sub>)

|   |          |           |           |
|---|----------|-----------|-----------|
| O | 4.093835 | -1.358942 | -0.182639 |
| N | 3.247009 | 1.980993  | 0.471318  |
| C | 3.834469 | 0.975028  | -0.383640 |
| C | 3.229937 | -0.382939 | -0.142621 |
| H | 3.711703 | -2.245831 | -0.097206 |
| H | 4.917674 | 0.851479  | -0.300095 |
| H | 3.624757 | 1.208027  | -1.433934 |
| H | 3.281542 | 2.896878  | 0.042438  |
| H | 3.722027 | 2.040146  | 1.364321  |

|   |           |           |           |
|---|-----------|-----------|-----------|
| H | 0.878225  | 0.943760  | -0.866448 |
| C | 0.862227  | 0.343559  | 0.043481  |
| N | 1.977353  | -0.597691 | 0.066613  |
| H | -2.872247 | -1.409547 | -0.700841 |
| C | -0.383200 | -0.552180 | 0.102914  |
| N | -1.554263 | 0.068255  | 0.017672  |
| O | -0.243515 | -1.757709 | 0.235381  |
| H | 1.598525  | -1.550889 | 0.207713  |
| H | -1.630536 | 1.073184  | -0.095293 |
| O | -3.739833 | 1.521361  | -0.232843 |
| C | -2.805110 | -0.655228 | 0.086421  |
| C | -3.924007 | 0.347065  | -0.076114 |
| O | -5.110146 | -0.240828 | -0.021012 |
| H | 0.906847  | 1.012972  | 0.900704  |
| H | -5.802935 | 0.428310  | -0.126922 |
| H | -2.914902 | -1.172283 | 1.042592  |

### TS<sub>8</sub> – TS<sub>9</sub> pathway

#### Initial

|   |           |           |           |
|---|-----------|-----------|-----------|
| O | -1.790468 | 1.491221  | -0.988186 |
| O | -0.294818 | 2.457151  | 0.373369  |
| O | -2.064329 | -1.695186 | -0.548404 |
| O | -4.150730 | -0.891100 | -0.585524 |
| N | 1.515628  | 0.589168  | -0.005522 |
| N | -1.445748 | -0.316692 | 1.708879  |
| C | 0.317405  | 0.475144  | -0.817696 |
| C | -0.608612 | 1.584032  | -0.385979 |
| C | -2.840587 | -0.376723 | 1.300161  |
| C | -2.945482 | -1.055284 | -0.041756 |
| H | -1.374370 | 0.081466  | 2.638172  |
| H | -1.067506 | -1.258133 | 1.746451  |
| H | -2.325333 | 2.260736  | -0.741940 |
| H | 1.489972  | 1.317580  | 0.701978  |
| H | -0.174775 | -0.488724 | -0.681049 |
| H | 0.559646  | 0.597477  | -1.876558 |
| H | -3.254154 | 0.629138  | 1.215737  |
| H | -3.499399 | -0.930613 | 1.982044  |
| H | -4.182369 | -1.381084 | -1.419801 |
| O | 2.702706  | -1.018563 | -1.072800 |
| N | 4.798581  | -0.905597 | 0.193982  |
| C | 3.801839  | 0.079441  | 0.702092  |
| C | 2.581092  | -0.151647 | -0.211864 |
| H | 5.066411  | -1.608050 | 0.882412  |
| H | 4.189684  | 1.091296  | 0.607014  |
| H | 3.568282  | -0.124157 | 1.744761  |
| H | 4.227286  | -1.357388 | -0.599720 |
| H | 5.644577  | -0.475662 | -0.178272 |

#### TS<sub>8</sub>

|   |           |           |           |
|---|-----------|-----------|-----------|
| O | 0.873350  | 0.459852  | 1.334311  |
| O | 0.323857  | 2.253056  | 0.002479  |
| O | 2.351362  | -1.545075 | -0.649303 |
| O | 4.147346  | -1.447963 | 0.689652  |
| N | -1.611557 | 0.506646  | -0.353129 |
| N | 2.033027  | 1.121910  | -0.676937 |
| C | -0.281009 | 0.018806  | -0.689858 |
| C | 0.674087  | 0.956032  | 0.054116  |
| C | 3.230729  | 0.592265  | -0.038599 |
| C | 3.172725  | -0.920253 | -0.038920 |
| H | 1.559143  | 2.242491  | -0.525378 |
| H | 1.970104  | 0.792162  | -1.638559 |
| H | 0.909573  | 1.228500  | 1.917810  |
| H | -1.647858 | 1.511287  | -0.188781 |
| H | -0.129538 | 0.086093  | -1.769343 |
| H | -0.168974 | -1.015001 | -0.373046 |
| H | 3.312780  | 0.959968  | 0.981698  |
| H | 4.117540  | 0.918289  | -0.585265 |
| H | 4.089682  | -2.413887 | 0.643570  |
| O | -2.702100 | -1.488041 | -0.333031 |
| N | -4.923243 | -0.739218 | 0.347357  |
| C | -3.974387 | 0.405563  | 0.256653  |
| C | -2.656982 | -0.268485 | -0.181919 |
| H | -5.702819 | -0.677699 | -0.305859 |
| H | -3.870115 | 0.888736  | 1.225693  |
| H | -4.322162 | 1.130123  | -0.476264 |
| H | -4.253355 | -1.543271 | 0.066437  |
| H | -5.293086 | -0.891351 | 1.284537  |

### Intermediate 1

|   |           |           |           |
|---|-----------|-----------|-----------|
| O | -0.000964 | 1.107832  | 1.375766  |
| O | 0.224795  | 2.455257  | -0.499448 |
| O | 2.766022  | -0.899909 | -1.327005 |
| O | 3.609554  | -2.010068 | 0.424420  |
| N | -1.431323 | 0.363126  | -0.861357 |
| N | 2.030285  | 1.265476  | 0.269286  |
| C | 0.008309  | 0.156854  | -0.759309 |
| C | 0.597445  | 1.260943  | 0.125098  |
| C | 2.650428  | 0.097284  | 0.859621  |
| C | 2.998476  | -0.976522 | -0.152523 |
| H | 0.727597  | 3.182247  | -0.112723 |
| H | 2.460059  | 1.489491  | -0.623354 |
| H | 0.427415  | 1.711616  | 1.994708  |
| H | -1.724432 | 1.268637  | -1.206234 |
| H | 0.464264  | 0.198224  | -1.746522 |
| H | 0.178389  | -0.823866 | -0.321181 |
| H | 1.994662  | -0.334724 | 1.618441  |
| H | 3.574107  | 0.375833  | 1.372356  |
| H | 3.842507  | -2.656094 | -0.258225 |
| O | -2.084528 | -1.484020 | 0.297979  |
| N | -4.487679 | -1.050484 | 0.448391  |

|   |           |           |           |
|---|-----------|-----------|-----------|
| C | -3.780653 | 0.048489  | -0.267143 |
| C | -2.309534 | -0.415144 | -0.260845 |
| H | -5.168333 | -1.542800 | -0.128701 |
| H | -3.898818 | 0.986044  | 0.272294  |
| H | -4.169982 | 0.155612  | -1.277112 |
| H | -3.648246 | -1.691106 | 0.670198  |
| H | -4.944031 | -0.750093 | 1.308720  |

### Intermediate 2

|   |           |           |           |
|---|-----------|-----------|-----------|
| O | 0.712138  | 1.739336  | 1.238776  |
| O | 0.517080  | 2.254456  | -1.016625 |
| N | -1.384469 | 0.670734  | 0.001640  |
| C | -0.011119 | 0.138383  | -0.258481 |
| C | 0.949018  | 1.320259  | -0.074320 |
| H | 1.144542  | 2.986897  | -1.067276 |
| H | 1.362644  | 2.406956  | 1.491414  |
| H | 0.025500  | -0.252532 | -1.271449 |
| H | 0.177647  | -0.655875 | 0.461728  |
| H | -1.386084 | 1.105356  | 0.934574  |
| N | 2.339599  | 1.062700  | -0.272131 |
| H | 2.541804  | 0.927041  | -1.257075 |
| H | -1.549513 | 1.444741  | -0.657002 |
| H | 2.675139  | 0.171869  | 1.598351  |
| C | 2.962234  | 0.042601  | 0.555886  |
| H | 4.046498  | 0.168453  | 0.506139  |
| H | -4.816400 | -1.645153 | 0.775774  |
| N | -4.935711 | -0.793389 | 0.243087  |
| H | -5.151451 | -1.024844 | -0.717923 |
| H | -3.711404 | 0.392306  | 1.432808  |
| C | -3.850086 | 0.117557  | 0.379261  |
| H | -4.066094 | 1.057483  | -0.143809 |
| O | -2.215719 | -1.421892 | -0.579479 |
| C | -2.512386 | -0.382748 | -0.123873 |
| C | 2.677137  | -1.401256 | 0.174149  |
| O | 2.713253  | -2.317214 | 0.936113  |
| H | 2.312456  | -2.473957 | -1.338516 |
| O | 2.394497  | -1.529414 | -1.137742 |

### TS<sub>9</sub>

|   |           |           |           |
|---|-----------|-----------|-----------|
| O | -0.121999 | 1.785936  | 1.162545  |
| O | 0.939572  | 2.529010  | -0.722649 |
| N | -1.439326 | 0.725021  | -0.498848 |
| C | -0.020766 | 0.390914  | -0.766823 |
| C | 0.833853  | 1.403721  | 0.025278  |
| H | 1.364874  | 3.238784  | -0.221611 |
| H | 0.113805  | 1.355407  | 1.998117  |
| H | 0.232814  | 0.459673  | -1.821473 |
| H | 0.140452  | -0.622731 | -0.413267 |
| H | -1.068505 | 1.404952  | 0.602674  |
| N | 2.049083  | 0.999031  | 0.599984  |
| H | 2.828350  | 1.403274  | 0.095575  |

|   |           |           |           |
|---|-----------|-----------|-----------|
| H | -1.872733 | 1.303641  | -1.214339 |
| H | 1.417793  | -0.804884 | 1.489802  |
| C | 2.289570  | -0.376180 | 0.986064  |
| H | 3.103377  | -0.411738 | 1.711557  |
| H | -4.665887 | -1.186700 | 1.148569  |
| N | -4.621137 | -1.227731 | 0.138395  |
| H | -4.370600 | -2.169770 | -0.134338 |
| H | -4.081750 | 0.762599  | -0.143163 |
| C | -3.746420 | -0.244861 | -0.417087 |
| H | -3.786145 | -0.280528 | -1.512969 |
| O | -1.795461 | -1.213975 | 0.645827  |
| C | -2.285959 | -0.363757 | -0.028343 |
| C | 2.649039  | -1.266049 | -0.195341 |
| O | 2.558604  | -0.914382 | -1.337198 |
| H | 3.285371  | -3.004242 | -0.558787 |
| O | 3.059600  | -2.459679 | 0.210780  |

### Intermediate 3

|   |           |           |           |
|---|-----------|-----------|-----------|
| O | -0.031707 | 2.519161  | 0.096904  |
| O | 0.350912  | -2.040665 | 0.840953  |
| N | 1.341928  | -0.586380 | -1.181053 |
| C | -0.067773 | -0.510954 | -0.910084 |
| C | -0.371939 | -1.029603 | 0.469433  |
| H | 0.175860  | -2.371925 | 1.733390  |
| H | 0.766084  | 2.157096  | 0.506374  |
| H | -0.622258 | -1.139628 | -1.609386 |
| H | -0.437496 | 0.513664  | -0.992021 |
| H | 0.067054  | 3.474632  | 0.074767  |
| N | -1.311828 | -0.547202 | 1.226274  |
| H | -1.471953 | -0.994871 | 2.121575  |
| H | 1.667250  | -1.063721 | -2.006774 |
| H | -1.713470 | 1.403987  | 0.548643  |
| C | -2.255947 | 0.505625  | 0.861342  |
| H | -2.839478 | 0.760485  | 1.743760  |
| H | 4.491841  | 0.147757  | 1.192647  |
| N | 4.598026  | 0.508052  | 0.252429  |
| H | 4.463148  | 1.510519  | 0.289112  |
| H | 3.937940  | -1.185943 | -0.754086 |
| C | 3.693872  | -0.121784 | -0.665423 |
| H | 3.825325  | 0.303220  | -1.664975 |
| O | 1.800079  | 0.491600  | 0.718043  |
| C | 2.217741  | -0.027535 | -0.306457 |
| C | -3.172252 | 0.034632  | -0.253992 |
| O | -2.975047 | -0.955379 | -0.897538 |
| H | -4.734797 | 0.587326  | -1.152588 |
| O | -4.173505 | 0.882011  | -0.418723 |

### Final (Gly<sub>3</sub>)

|   |           |          |           |
|---|-----------|----------|-----------|
| O | -0.380285 | 2.093255 | 1.142661  |
| N | -1.993451 | 0.962552 | -0.842698 |
| C | -0.660602 | 1.431070 | -1.099847 |

|   |           |           |           |
|---|-----------|-----------|-----------|
| C | 0.153673  | 1.419705  | 0.168931  |
| H | 0.099379  | 2.049881  | 1.983499  |
| H | -0.693269 | 2.467051  | -1.444744 |
| H | -0.157758 | 0.826363  | -1.855709 |
| N | 1.317569  | 0.868496  | 0.269133  |
| H | 1.856157  | 0.926338  | 1.139400  |
| H | -2.791577 | 1.512441  | -1.118428 |
| H | 2.204990  | 0.391655  | -1.599395 |
| C | 1.899631  | -0.085689 | -0.667354 |
| H | 1.180186  | -0.882273 | -0.871664 |
| H | -3.273021 | -1.950271 | 1.609816  |
| N | -3.646171 | -2.017971 | 0.671186  |
| H | -3.156444 | -2.767140 | 0.197670  |
| H | -4.115425 | -0.002118 | 0.474564  |
| C | -3.538786 | -0.777643 | -0.039666 |
| H | -3.987650 | -0.880240 | -1.032862 |
| O | -1.118424 | -0.841890 | 0.119067  |
| C | -2.124546 | -0.252700 | -0.234488 |
| C | 3.122111  | -0.660943 | 0.025780  |
| O | 3.450286  | -0.326540 | 1.128571  |
| H | 4.507266  | -1.899991 | -0.280741 |
| O | 3.732505  | -1.540579 | -0.740910 |
